# Supplementary material for: Comparison of Six Different Percutaneous Coronary Intervention Guidance Modalities
Source: MDPI journal article supplement (doi:10.3390/jcdd9100343), 2022-10-08

**Figure S1** Different Guidance Modalities Included in the Network Meta-Analysis (A)

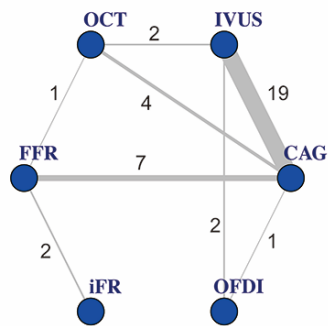

CAG: coronary angiography; FFR: fractional flow reserve; iFR: instantaneous wave-free ratio; IVUS: intravascular ultrasound; OCT: optical coherence tomography; OFDI: optical frequency domain imaging

**Figure S2** Quality Assessment Summary of Included Studies

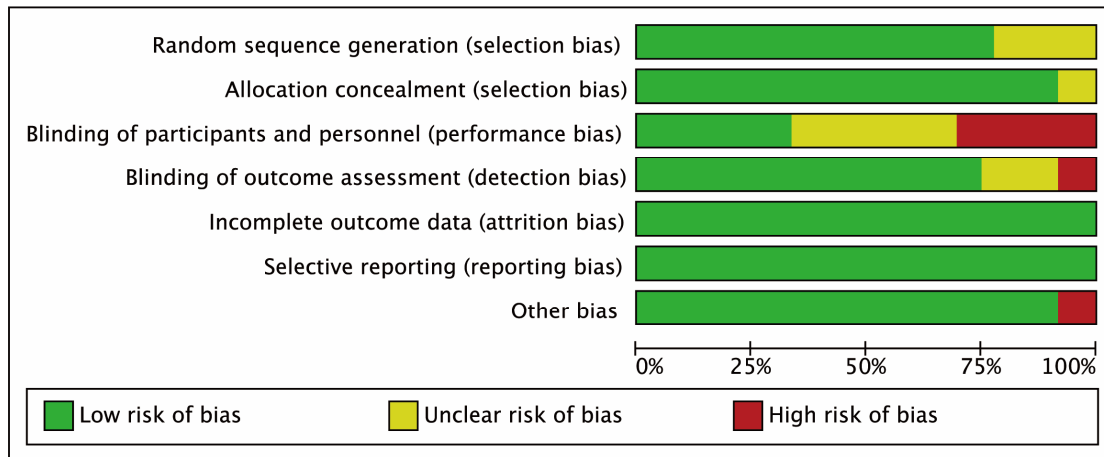

CAG: coronary angiography; FFR: fractional flow reserve; iFR: instantaneous wave-free ratio; IVUS: intravascular ultrasound; OCT: optical coherence tomography; OFDI: optical frequency domain imaging

**Figure S3** Major Adverse Cardiovascular Events of Network Node-Split

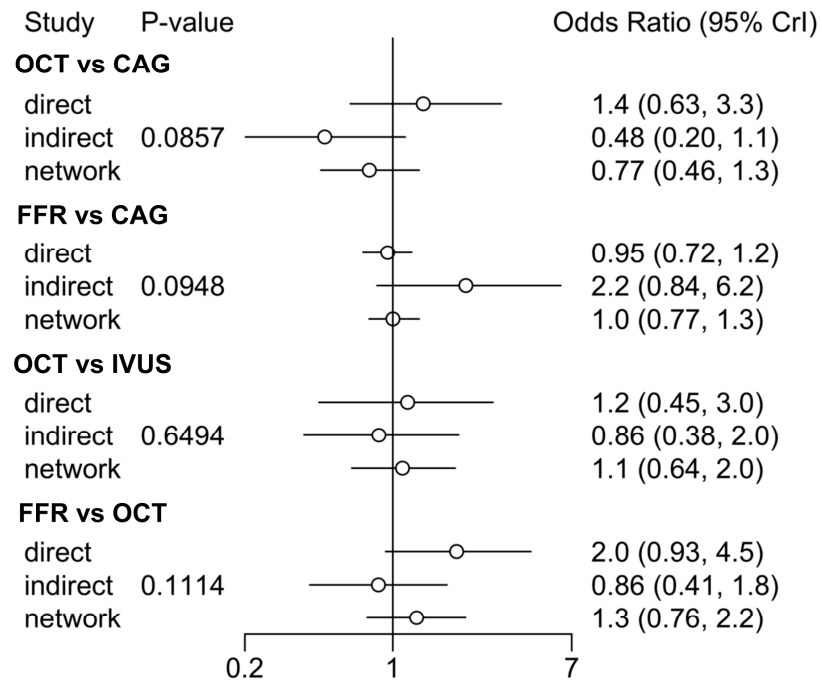

CAG: coronary angiography; FFR: fractional flow reserve; IVUS: intravascular ultrasound;  
OCT: optical coherence tomography

**Figure S4 All-Cause Death of Network Node-Split**

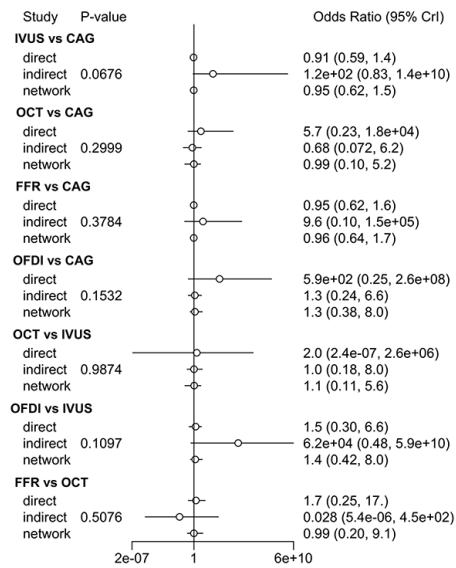

CAG: coronary angiography; FFR: fractional flow reserve; IVUS: intravascular ultrasound;  
OCT: optical coherence tomography; OFDI: optical frequency domain imaging

**Figure S5** Myocardial Infarction of Network Node-Split

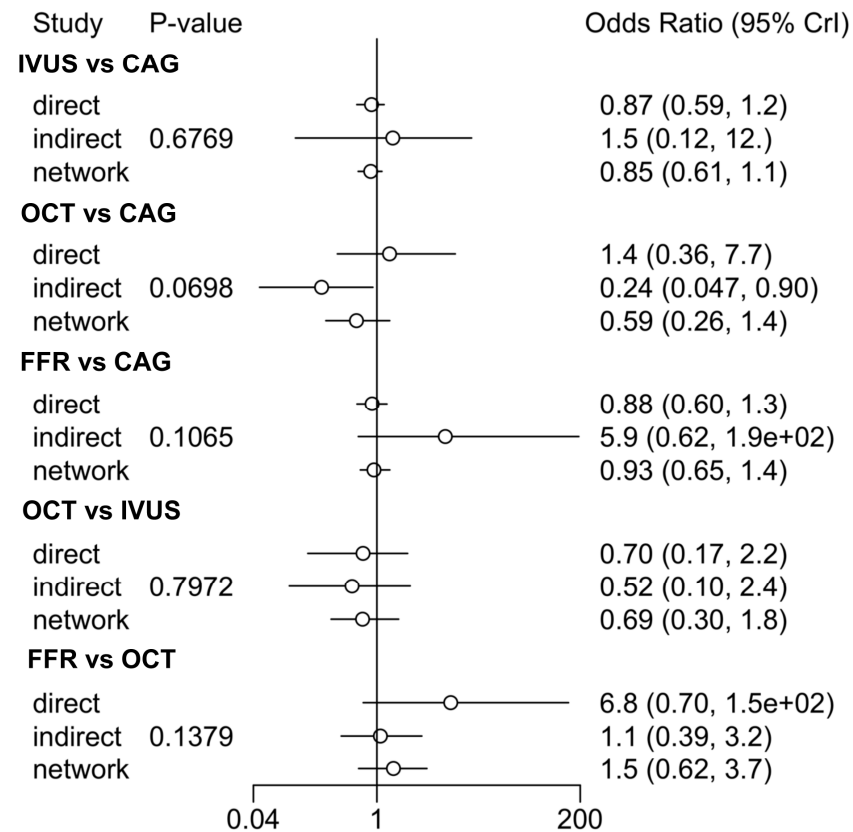

CAG: coronary angiography; FFR: fractional flow reserve; IVUS: intravascular ultrasound;  
OCT: optical coherence tomography

**Figure S6** Target Vessel/Lesion Revascularization of Network Node-Split

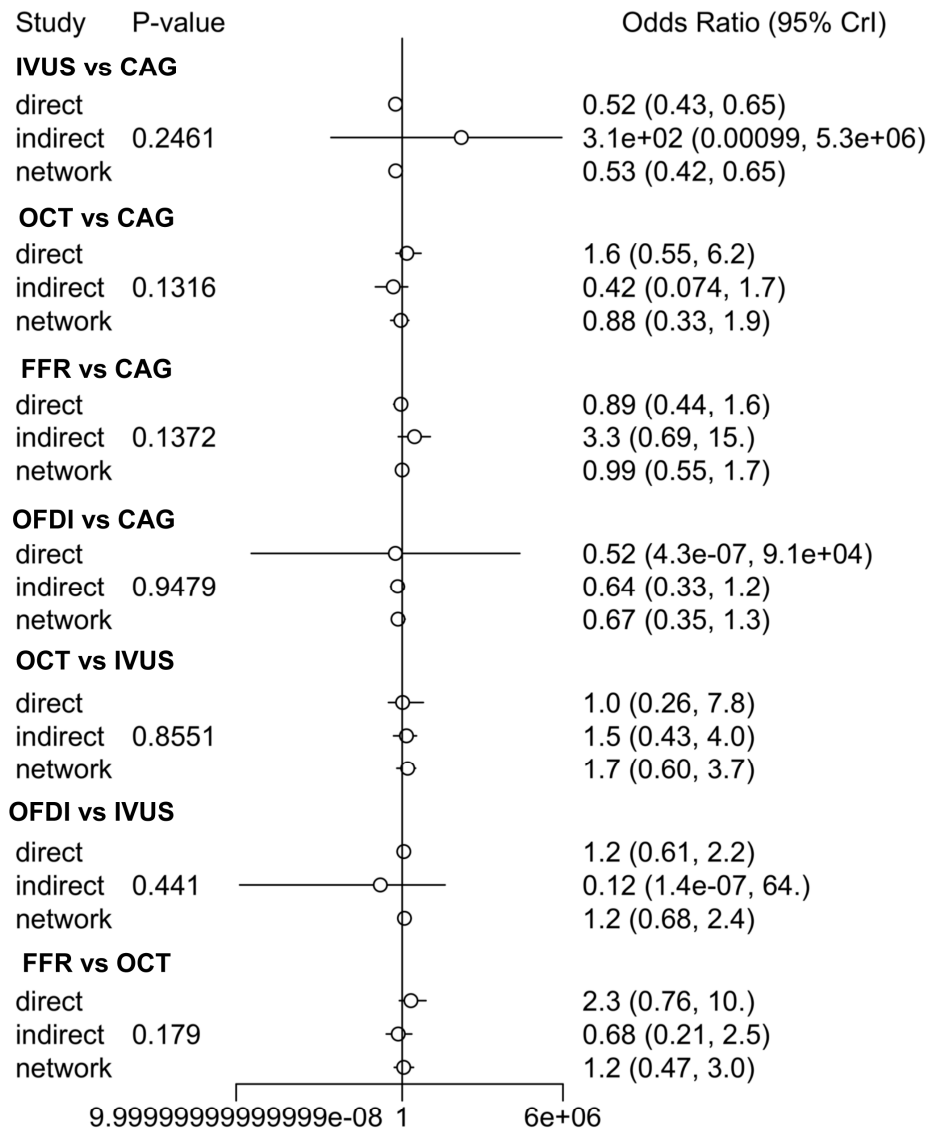

CAG: coronary angiography; FFR: fractional flow reserve; IVUS: intravascular ultrasound;  
OCT: optical coherence tomography; OFDI: optical frequency domain imaging

**Figure S7** Funnel Plot of Publication Bias for Major Adverse Cardiovascular Events (A), All-Cause Death (B), Myocardial Infarction (C), and Target Vessel/Lesion Revascularization (D)

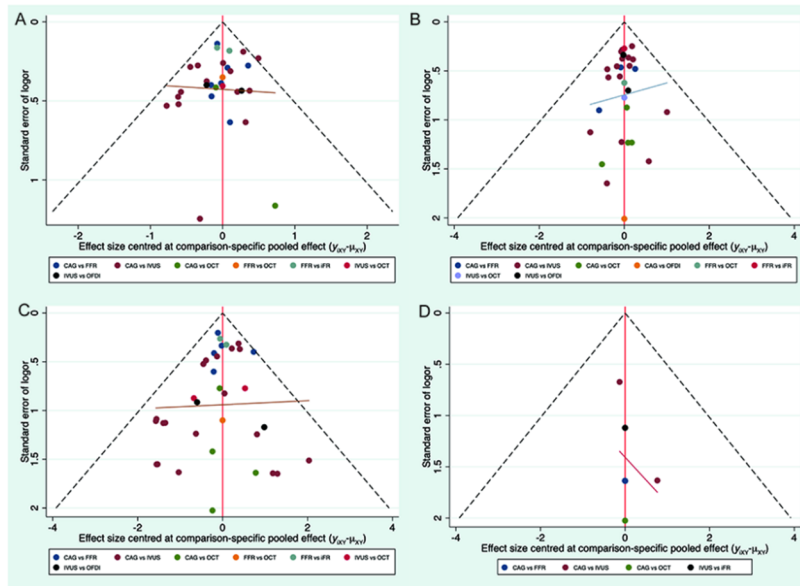

CAG: coronary angiography; FFR: fractional flow reserve; iFR: instantaneous wave-free ratio; IVUS: intravascular ultrasound; OCT: optical coherence tomography; OFDI: optical frequency domain imaging

**Figure S8** Sensitivity Analysis Leaving Out Studies Using Bare Metal Stent or Conducted before 2000

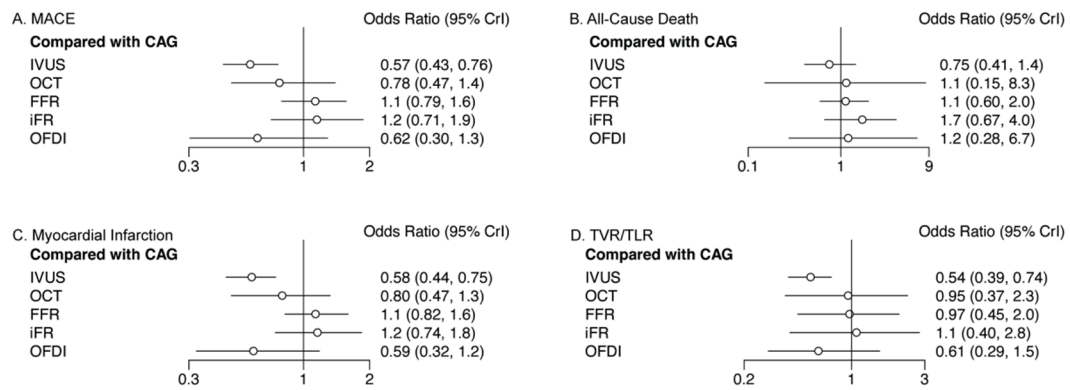



**Figure S9** Sensitivity Analysis Focusing on Patients with Acute Coronary Syndrome

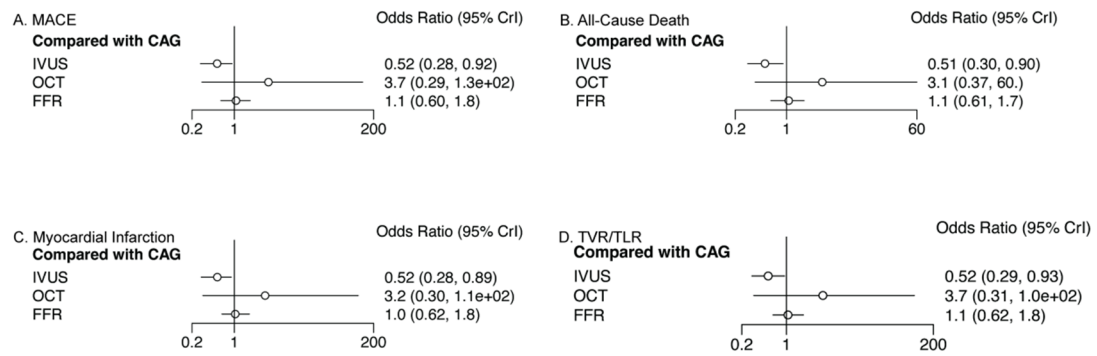

**Figure S10** Sensitivity Analysis Focusing on Patients with Stable Angina

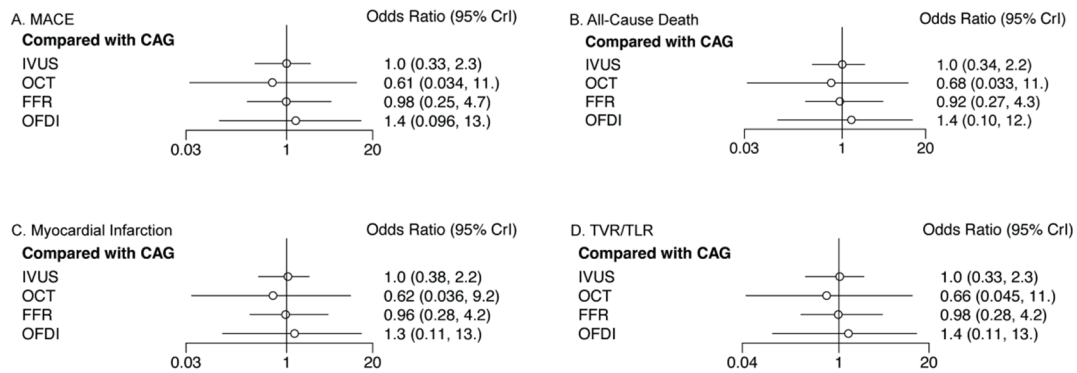

**Figure S11** Sensitivity Analysis Focusing on Patients with Complex Lesions

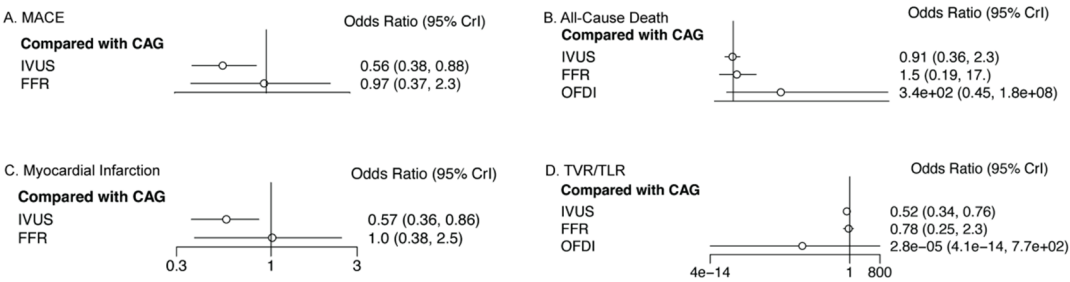

**Figure S12** Sensitivity Analysis Focusing on Patients without Complex Lesions

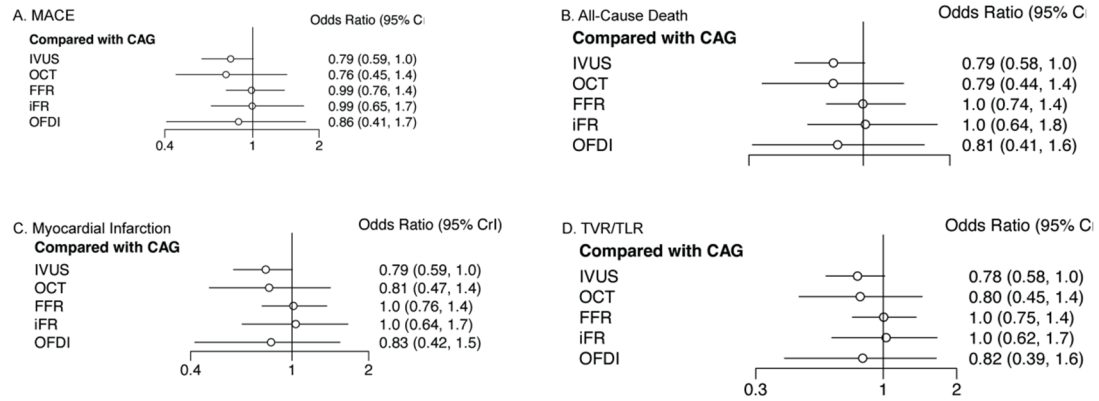

**Figure S13** Comparisons of Stent Thrombosis Among Guidance Modalities Included in the Network Meta-Analysis

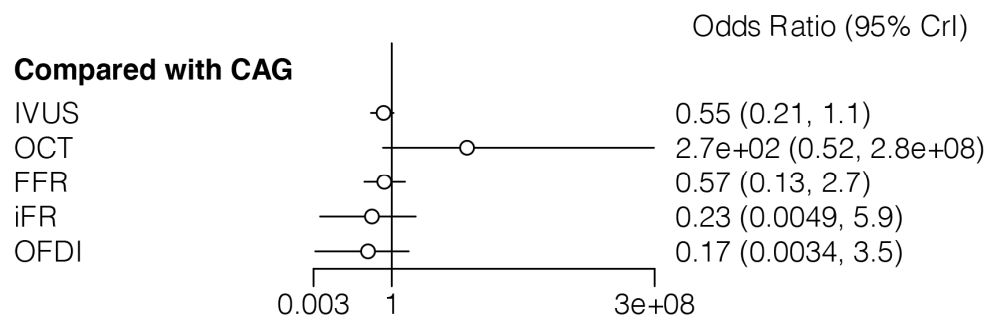

Supplement: s1 [file s1]
