# Supplementary material for: Comparison of Six Different Percutaneous Coronary Intervention Guidance Modalities
Source: MDPI journal article supplement (doi:10.3390/jcdd9100343), 2022-10-08
Supplement: s1 [file s1]

Table S1 Characteristics of Studies Included in the Network Meta-Analysis

| Study/First author, year   | Period   | Center      | Number of Patients | Stent Type | Inclusion criteria                                                                  | Exclusion criteria                                                                                                                                                                       | Primary outcome | MACE definition | Maximum follow-up |
|----------------------------|----------|-------------|--------------------|------------|-------------------------------------------------------------------------------------|------------------------------------------------------------------------------------------------------------------------------------------------------------------------------------------|-----------------|-----------------|-------------------|
| IVUS versus CAG            |          |             |                    |            |                                                                                     |                                                                                                                                                                                          |                 |                 |                   |
| SIPS, <sup>1</sup> 2000    | 1996.02- | single      | 121/148            | BMS        | elective or urgent                                                                  | emergency                                                                                                                                                                                | minimal         | death, MI, re-  | 2 years           |
|                            | 1996.05  | center      |                    |            | PTCA or primary stenting in vessels of diameter 2.2 and 4.6 mm                      | intervention, planned atherectomy, CTO                                                                                                                                                   | lumen diameter  | PTCA, and CABG  |                   |
| CRUISE, <sup>2</sup> 2000  | 1996.04- | multicenter | 290/253            | BMS        | symptomatic                                                                         | revascularization of                                                                                                                                                                     | minimal stent   | death, MI, and  | 9 months          |
|                            | 1997.05  |             |                    |            | ischemic heart disease, new lesions or restenotic lesions, and planned implantation | lesions other than the stented lesion, aspirin, ticlopidine, or cumarin was contraindicated, LM disease, MI within 7 days, stroke/transient ischemic neurological attack within 3 months | dimensions      | TVR             |                   |
| OPTICUS, <sup>3</sup> 2001 | 1996.10- | multicenter | 273/275            | BMS        | angina                                                                              | or                                                                                                                                                                                       | acute angina at | restenosis      | death, MI, 1 year |
|                            | 1998.02  |             |                    |            | ischemia, no                                                                        | rest, complete                                                                                                                                                                           | rate, minimal   | CABG, and       |                   |

|                              |          |        |       |     |                  |                      |                     |               |             |            |           |  |
|------------------------------|----------|--------|-------|-----|------------------|----------------------|---------------------|---------------|-------------|------------|-----------|--|
|                              |          |        |       |     |                  | contraindication     | akinesia            | in the        | lumen       | repeat PCI |           |  |
|                              |          |        |       |     |                  | to antiplatelet      | myocardium          |               | diameter,   |            |           |  |
|                              |          |        |       |     |                  | therapy, and         | supplied by the     |               | and percent |            |           |  |
|                              |          |        |       |     |                  | lesion length ≤25    | target              | artery,       | diameter    |            |           |  |
|                              |          |        |       |     |                  | mm                   | significant         | LM            | stenosis    |            |           |  |
|                              |          |        |       |     |                  |                      | lesion, bifurcation |               |             |            |           |  |
|                              |          |        |       |     |                  |                      | lesion, and         |               |             |            |           |  |
|                              |          |        |       |     |                  |                      | involvement of a    |               |             |            |           |  |
|                              |          |        |       |     |                  |                      | side branch ≥2 mm   |               |             |            |           |  |
|                              |          |        |       |     |                  |                      | in diameter with    |               |             |            |           |  |
|                              |          |        |       |     |                  |                      | ostial stenosis     |               |             |            |           |  |
| Gaster, <sup>4, 5</sup> 2003 | 1997     | single | 54/54 | BMS | male patients    | follow-up            | was                 | recurrence of | NA          |            | 2.5 years |  |
|                              |          | center |       |     | referred for PCI | unlikely,            | MI<3                | stenosis      |             |            |           |  |
|                              |          |        |       |     |                  | months, unstable     |                     |               |             |            |           |  |
|                              |          |        |       |     |                  | angina within a      |                     |               |             |            |           |  |
|                              |          |        |       |     |                  | month, left bundle   |                     |               |             |            |           |  |
|                              |          |        |       |     |                  | branch block, atrial |                     |               |             |            |           |  |
|                              |          |        |       |     |                  | fibrillation, serum  |                     |               |             |            |           |  |
|                              |          |        |       |     |                  | creatinine >200      |                     |               |             |            |           |  |
|                              |          |        |       |     |                  | μmol/l,              |                     |               |             |            |           |  |
|                              |          |        |       |     |                  | thyrotoxicosis,      |                     |               |             |            |           |  |
|                              |          |        |       |     |                  | polycythemia, total  |                     |               |             |            |           |  |
|                              |          |        |       |     |                  | occlusion            |                     |               |             |            |           |  |
| TULIP, <sup>6</sup> 2003     | 1998.06- | single | 74/76 | BMS | nonostial        | MI within 2 weeks,   | cardiac             | cardiac       | death,      | 1 year     |           |  |

|                          |                     |             |         |     |                       |                       |            |        |                   |                         |
|--------------------------|---------------------|-------------|---------|-----|-----------------------|-----------------------|------------|--------|-------------------|-------------------------|
|                          | 2001.01             | center      |         |     | stenosis $\geq 20$ mm | total                 | occlusion, | death, | MI,               | MI, TLR                 |
|                          |                     |             |         |     | length with a         | contraindications     |            | TLR    |                   |                         |
|                          |                     |             |         |     | reference             | for                   | combined   |        |                   |                         |
|                          |                     |             |         |     | diameter that         | antiplatelet therapy  |            |        |                   |                         |
|                          |                     |             |         |     | permitted             |                       |            |        |                   |                         |
|                          |                     |             |         |     | implantation of       |                       |            |        |                   |                         |
|                          |                     |             |         |     | $\geq 3$ -mm stents   |                       |            |        |                   |                         |
|                          |                     |             |         |     | without               |                       |            |        |                   |                         |
|                          |                     |             |         |     | involvement of        |                       |            |        |                   |                         |
|                          |                     |             |         |     | significant side      |                       |            |        |                   |                         |
|                          |                     |             |         |     | branches              |                       |            |        |                   |                         |
|                          |                     |             |         |     | (diameter $\geq 2.0$  |                       |            |        |                   |                         |
|                          |                     |             |         |     | mm).                  |                       |            |        |                   |                         |
| DIPOL, <sup>7</sup> 2007 | 2000.09-<br>2002.12 | multicenter | 83/80   | BMS | stable angina         | recent                | MI or      | MACE   | death, MI, and    | 6 months                |
|                          |                     |             |         |     | pectoris, age         | unstable              | angina,    |        | revascularization |                         |
|                          |                     |             |         |     | between 18 and        | LM stenosis, large    |            |        |                   |                         |
|                          |                     |             |         |     | 70 years, 1 or 2      | calcifications, large |            |        |                   |                         |
|                          |                     |             |         |     | "de novo" vessel      | (>2 mm in diameter)   |            |        |                   |                         |
|                          |                     |             |         |     | disease, vessel       | side branch, and      |            |        |                   |                         |
|                          |                     |             |         |     | reference             | CTO                   |            |        |                   |                         |
|                          |                     |             |         |     | diameter >2.75        |                       |            |        |                   |                         |
|                          |                     |             |         |     | mm, and lesion        |                       |            |        |                   |                         |
|                          |                     |             |         |     | length $\geq 25$ mm   |                       |            |        |                   |                         |
| AVID, <sup>8</sup> 2009  | 1995-               | multicenter | 394/406 | BMS | >18                   | years,                | dissection | not    | TLR               | death, MI, stent 1 year |

|                             |                     |                  |         |     |                                                                              |                                       |      |                                     |           |
|-----------------------------|---------------------|------------------|---------|-----|------------------------------------------------------------------------------|---------------------------------------|------|-------------------------------------|-----------|
| 1999                        |                     |                  |         |     |                                                                              | scheduled for covered by stent,       |      | thrombosis,                         |           |
|                             |                     |                  |         |     |                                                                              | elective coronary TIMI <3 after stent |      | CABG                                |           |
|                             |                     |                  |         |     |                                                                              | stent placement placement, CTO,       |      |                                     |           |
|                             |                     |                  |         |     |                                                                              | stent placement in a                  |      |                                     |           |
|                             |                     |                  |         |     |                                                                              | sole remaining                        |      |                                     |           |
|                             |                     |                  |         |     |                                                                              | circulation or LM                     |      |                                     |           |
|                             |                     |                  |         |     |                                                                              | equivalent, stent                     |      |                                     |           |
|                             |                     |                  |         |     |                                                                              | placement within an                   |      |                                     |           |
|                             |                     |                  |         |     |                                                                              | aneurysmal portion                    |      |                                     |           |
|                             |                     |                  |         |     |                                                                              | of a vessel, bypass                   |      |                                     |           |
|                             |                     |                  |         |     |                                                                              | graft supplying a                     |      |                                     |           |
|                             |                     |                  |         |     |                                                                              | native vessel <2.0                    |      |                                     |           |
|                             |                     |                  |         |     |                                                                              | mm, cardiac                           |      |                                     |           |
|                             |                     |                  |         |     |                                                                              | transplantation,                      |      |                                     |           |
|                             |                     |                  |         |     |                                                                              | performance of                        |      |                                     |           |
|                             |                     |                  |         |     |                                                                              | IVUS during the                       |      |                                     |           |
|                             |                     |                  |         |     |                                                                              | index procedure                       |      |                                     |           |
|                             |                     |                  |         |     |                                                                              | before stent                          |      |                                     |           |
|                             |                     |                  |         |     |                                                                              | placement                             |      |                                     |           |
| Jakabcin, <sup>9</sup> 2010 | 2004.01-<br>2005.12 | single<br>center | 105/105 | DES | lesion type B2<br>and C, proximal<br>LAD, LM<br>disease,<br>reference vessel | NA                                    | MACE | death, MI, and<br>revascularization | 1.5 years |

ACS

death, and TVR

| Study                | Year            | Design      | Patients (n) | Intervention | Comparison                      | Primary Endpoints                                                                                                                                                                                                                                                  | Secondary Endpoints | Follow-up                                          |
|----------------------|-----------------|-------------|--------------|--------------|---------------------------------|--------------------------------------------------------------------------------------------------------------------------------------------------------------------------------------------------------------------------------------------------------------------|---------------------|----------------------------------------------------|
| RESET, <sup>11</sup> | 2009.04-2010.12 | multicenter | 269/274      | DES          | lesion requiring a stent ≥28 mm | bleeding within 3 months, hypersensitivity to heparin, aspirin, clopidogrel, or a limus-related drug, cerebral vascular accident, peripheral artery occlusive diseases, thromboembolic disease, stent thrombosis, cardiogenic shock, LVEF <40%, STEMI within 48 h, | MACE                | cardiac death, 1 year MI, TVR, or stent thrombosis |

NA

|                              |          |             |         |     |                   |                         |               |      |                |         |  |  |
|------------------------------|----------|-------------|---------|-----|-------------------|-------------------------|---------------|------|----------------|---------|--|--|
|                              |          |             |         |     | aortic            | balloon                 |               |      |                |         |  |  |
|                              |          |             |         |     | pumping           |                         |               |      |                |         |  |  |
| Tan <sup>13</sup> , 2015     | 2009.10- | single      | 61/62   | DES | >70 years, LM     | LVEF                    | <30%,         | MACE | death, MI, and | 2 years |  |  |
|                              | 2012.09  | center      |         |     | disease           | cardiogenic shock,      |               |      | TLR            |         |  |  |
|                              |          |             |         |     |                   | MI, carcinoma.          |               |      |                |         |  |  |
| AIR-CTO <sup>14</sup> , 2015 | 2010.10- | multicenter | 115/115 | DES | 18-80 years, age  | >80 years,              | in-stent late | NA   |                | 2 years |  |  |
|                              | 2011.11  |             |         |     | silent ischaemia, | pregnant, liver         | lumen loss    |      |                |         |  |  |
|                              |          |             |         |     | stable angina,    | dysfunction,            |               |      |                |         |  |  |
|                              |          |             |         |     | unstable angina   | creatinine              | >2.5          |      |                |         |  |  |
|                              |          |             |         |     | or previous MI,   | mg/dl,                  | major         |      |                |         |  |  |
|                              |          |             |         |     | CTO               | bleeding or stroke      |               |      |                |         |  |  |
|                              |          |             |         |     |                   | within six months,      |               |      |                |         |  |  |
|                              |          |             |         |     |                   | platelet count          |               |      |                |         |  |  |
|                              |          |             |         |     |                   | <8×10 <sup>9</sup> /L,  | white         |      |                |         |  |  |
|                              |          |             |         |     |                   | blood cells             |               |      |                |         |  |  |
|                              |          |             |         |     |                   | <40×10 <sup>9</sup> /L, | life          |      |                |         |  |  |
|                              |          |             |         |     |                   | expectancy              | <12           |      |                |         |  |  |
|                              |          |             |         |     |                   | months, allergy to      |               |      |                |         |  |  |
|                              |          |             |         |     |                   | the study               |               |      |                |         |  |  |
|                              |          |             |         |     |                   | medications, failure    |               |      |                |         |  |  |
|                              |          |             |         |     |                   | of recanalisation in    |               |      |                |         |  |  |
|                              |          |             |         |     |                   | a CTO lesion,           |               |      |                |         |  |  |
|                              |          |             |         |     |                   | STEMI <24 hours,        |               |      |                |         |  |  |
|                              |          |             |         |     |                   | and intolerance to      |               |      |                |         |  |  |



|                              |                 |             |         |     |                                                                  |                                                                                                                                                                                                                                                                                                                                                      |  |                       |  |  |
|------------------------------|-----------------|-------------|---------|-----|------------------------------------------------------------------|------------------------------------------------------------------------------------------------------------------------------------------------------------------------------------------------------------------------------------------------------------------------------------------------------------------------------------------------------|--|-----------------------|--|--|
|                              |                 |             |         |     |                                                                  | dual antiplatelet                                                                                                                                                                                                                                                                                                                                    |  |                       |  |  |
|                              |                 |             |         |     |                                                                  | therapy                                                                                                                                                                                                                                                                                                                                              |  |                       |  |  |
| IVUS-XPL, <sup>15</sup> 2015 | 2010.10-2014.07 | multicenter | 700/700 | DES | chest pain or MI, long coronary lesions (implanted stent ≥28 mm) | MI within 48 h, MACE                                                                                                                                                                                                                                                                                                                                 |  | cardiac death, 1 year |  |  |
|                              |                 |             |         |     |                                                                  | contraindication for anti-platelet agents and bleeding within 3 months, cerebral vascular accident, peripheral artery occlusive disease, thromboembolic disease, stent thrombosis, >80 years, severe hepatic dysfunction, significant renal dysfunction, significant leucopenia, neutropenia, thrombocytopenia, anemia, or known bleeding diathesis, |  | MI, and TVR           |  |  |

|                          |          |             |         |     |                   |                     |         |                |        |  |
|--------------------------|----------|-------------|---------|-----|-------------------|---------------------|---------|----------------|--------|--|
|                          |          |             |         |     |                   | cardiogenic shock,  |         |                |        |  |
|                          |          |             |         |     |                   | LVEF <40%,          |         |                |        |  |
|                          |          |             |         |     |                   | pregnant, life      |         |                |        |  |
|                          |          |             |         |     |                   | expectancy <1       |         |                |        |  |
|                          |          |             |         |     |                   | year, LM disease    |         |                |        |  |
|                          |          |             |         |     |                   | requiring PCI,      |         |                |        |  |
|                          |          |             |         |     |                   | bifurcation lesion, |         |                |        |  |
|                          |          |             |         |     |                   | CTO, implanting     |         |                |        |  |
|                          |          |             |         |     |                   | DES within 6        |         |                |        |  |
|                          |          |             |         |     |                   | months, in-stent    |         |                |        |  |
|                          |          |             |         |     |                   | restenosis          |         |                |        |  |
| CTO-IVUS, <sup>16</sup>  | 2012.03- | multicenter | 201/201 | DES | CTO, 20 to 80     | LM disease, in-     | cardiac | cardiac death, | 1 year |  |
| 2015                     | 2013.08  |             |         |     | years, typical    | stent restenosis,   | death   | MI, and TVR    |        |  |
|                          |          |             |         |     | symptomatic       | ACS, LVEF <30%,     |         |                |        |  |
|                          |          |             |         |     | angina or         | IVUS use before     |         |                |        |  |
|                          |          |             |         |     | ischemia          | randomization       |         |                |        |  |
| Wang, <sup>17</sup> 2015 | 2012.10- | single      | 38/42   | DES | STEMI within 12   | residual            | MACE    | cardiac death, | 1 year |  |
|                          | 2013.08  | center      |         |     | h, preprocedural  | stenosis >75% or    |         | MI, TVR, and   |        |  |
|                          |          |             |         |     | TIMI grade 0/1    | TIMI grade <3 flow  |         | intractable    |        |  |
|                          |          |             |         |     | flow or thrombus  | after aspiration    |         | myocardial     |        |  |
|                          |          |             |         |     | grade ≥3 in the   | thrombectomy, ≥2    |         | ischemia       |        |  |
|                          |          |             |         |     | IRA, 50–75%       | stents inserted, LM |         |                |        |  |
|                          |          |             |         |     | residual stenosis | occlusion,          |         |                |        |  |
|                          |          |             |         |     | after aspiration  | hemodynamic         |         |                |        |  |

|                         |          |             |         |     |                   |                       |               |                |        |  |
|-------------------------|----------|-------------|---------|-----|-------------------|-----------------------|---------------|----------------|--------|--|
|                         |          |             |         |     | thrombectomy      | instability, old MI,  |               |                |        |  |
|                         |          |             |         |     | and a TIMI grade  | prior                 |               |                |        |  |
|                         |          |             |         |     | 3 flow at the     | cardiopulmonary       |               |                |        |  |
|                         |          |             |         |     | distal end of the | resuscitation,        |               |                |        |  |
|                         |          |             |         |     | IRA               | hepatic and renal     |               |                |        |  |
|                         |          |             |         |     |                   | dysfunction or        |               |                |        |  |
|                         |          |             |         |     |                   | neoplastic disease,   |               |                |        |  |
|                         |          |             |         |     |                   | valvular heart        |               |                |        |  |
|                         |          |             |         |     |                   | disease, congenital   |               |                |        |  |
|                         |          |             |         |     |                   | heart disease, or     |               |                |        |  |
|                         |          |             |         |     |                   | cardiomyopathy,       |               |                |        |  |
|                         |          |             |         |     |                   | coronary              |               |                |        |  |
|                         |          |             |         |     |                   | angioplasty or        |               |                |        |  |
|                         |          |             |         |     |                   | CABG, coagulation     |               |                |        |  |
|                         |          |             |         |     |                   | disorders, no         |               |                |        |  |
|                         |          |             |         |     |                   | tolerance for         |               |                |        |  |
|                         |          |             |         |     |                   | aspirin, clopidogrel, |               |                |        |  |
|                         |          |             |         |     |                   | heparin and           |               |                |        |  |
|                         |          |             |         |     |                   | contrast medium       |               |                |        |  |
|                         |          |             |         |     |                   | allergies             |               |                |        |  |
| ULTIMATE, <sup>18</sup> | 2014.08- | multicenter | 724/724 | DES | silent ischemia,  | life expectancy <12   | target-vessel | cardiac death, | 1 year |  |
| 2018                    | 2017.05  |             |         |     | stable or         | months, intolerant    | failure       | MI, and TVR    |        |  |
|                         |          |             |         |     | unstable angina,  | of antithrombotic     |               |                |        |  |
|                         |          |             |         |     | MI >24 h, and a   | therapy, significant  |               |                |        |  |

|                          |          |             |         |     |                  |                       |           |  |                   |          |  |
|--------------------------|----------|-------------|---------|-----|------------------|-----------------------|-----------|--|-------------------|----------|--|
|                          |          |             |         |     | de novo          | anemia,               |           |  |                   |          |  |
|                          |          |             |         |     | coronary lesion  | thrombocytopenia,     |           |  |                   |          |  |
|                          |          |             |         |     | eligible for DES | or leucopenia,        |           |  |                   |          |  |
|                          |          |             |         |     | implantation     | history of major      |           |  |                   |          |  |
|                          |          |             |         |     |                  | hemorrhage, CTO,      |           |  |                   |          |  |
|                          |          |             |         |     |                  | severe calcification  |           |  |                   |          |  |
|                          |          |             |         |     |                  | needing rotational    |           |  |                   |          |  |
|                          |          |             |         |     |                  | atherectomy           |           |  |                   |          |  |
| SURF, <sup>19</sup> 2019 | 2012.11- | single      | 688/700 | DES | >18 years        | cardiogenic shock,    | major     |  | death, stroke, MI | 30 days  |  |
|                          | 2017.11  | center      |         |     | referred for CAG | dialysis, severe      | bleeding, |  | or urgent TLR     |          |  |
|                          |          |             |         |     | and PCI          | peripheral vascular   | MACE      |  |                   |          |  |
|                          |          |             |         |     |                  | disease, previous     |           |  |                   |          |  |
|                          |          |             |         |     |                  | failed access, or a   |           |  |                   |          |  |
|                          |          |             |         |     |                  | failed Allen's test   |           |  |                   |          |  |
| OCT versus CAG           |          |             |         |     |                  |                       |           |  |                   |          |  |
| DOCTORS, <sup>20</sup>   | 2013.09- | multicenter | 120/120 | DES | 18 to 80 years,  | LM disease, in-       | FFR       |  | NA                | 6 months |  |
| 2016                     | 2015.12  |             |         |     | NSTEMI           | stent restenosis,     |           |  |                   |          |  |
|                          |          |             |         |     |                  | presence of           |           |  |                   |          |  |
|                          |          |             |         |     |                  | coronary artery       |           |  |                   |          |  |
|                          |          |             |         |     |                  | bypass grafts,        |           |  |                   |          |  |
|                          |          |             |         |     |                  | cardiogenic shock     |           |  |                   |          |  |
|                          |          |             |         |     |                  | or severe             |           |  |                   |          |  |
|                          |          |             |         |     |                  | hemodynamic           |           |  |                   |          |  |
|                          |          |             |         |     |                  | instability, severely |           |  |                   |          |  |

|                            |          |             |        |     |                         |                       |             |                |          |  |
|----------------------------|----------|-------------|--------|-----|-------------------------|-----------------------|-------------|----------------|----------|--|
|                            |          |             |        |     |                         | calcified or tortuous |             |                |          |  |
|                            |          |             |        |     |                         | arteries, persistent  |             |                |          |  |
|                            |          |             |        |     |                         | ST-segment            |             |                |          |  |
|                            |          |             |        |     |                         | elevation, $\geq 1$   |             |                |          |  |
|                            |          |             |        |     |                         | lesions considered    |             |                |          |  |
|                            |          |             |        |     |                         | angiographically      |             |                |          |  |
|                            |          |             |        |     |                         | significant, or       |             |                |          |  |
|                            |          |             |        |     |                         | nonsignificant        |             |                |          |  |
|                            |          |             |        |     |                         | diffuse disease,      |             |                |          |  |
|                            |          |             |        |     |                         | severe renal          |             |                |          |  |
|                            |          |             |        |     |                         | insufficiency,        |             |                |          |  |
|                            |          |             |        |     |                         | bacteremia or         |             |                |          |  |
|                            |          |             |        |     |                         | septicemia, severe    |             |                |          |  |
|                            |          |             |        |     |                         | coagulation           |             |                |          |  |
|                            |          |             |        |     |                         | disorders;            |             |                |          |  |
|                            |          |             |        |     |                         | pregnancy             |             |                |          |  |
| ROBUST, <sup>21</sup> 2018 | 2011.02- | multicenter | 105/96 | DES | 18 and 85 years,        | cardiogenic shock,    | MACE        | death, MI, and | 9 months |  |
|                            | 2012.10  |             |        |     | STEMI                   | LM disease, and       |             | TLR            |          |  |
|                            |          |             |        |     |                         | ostial lesion         |             |                |          |  |
| OPTICO BVS, <sup>22</sup>  | 2016.06- | multicenter | 19/19  | BVS | $\geq 18$ years, stable | LM disease, ostial    | in-scaffold | NA             | 6 months |  |
| 2020                       | 2017.05  |             |        |     | angina, or ACS          | lesion, severe        | minimal     |                |          |  |
|                            |          |             |        |     |                         | calcified lesions,    | lumen area  |                |          |  |
|                            |          |             |        |     |                         | and bifurcation with  |             |                |          |  |
|                            |          |             |        |     |                         | sidebranch $>2.5$     |             |                |          |  |

mm or any  
sidebranch that  
possibly requires  
treatment

OFDI versus CAG

|                        |          |             |       |     |                  |                        |            |    |        |
|------------------------|----------|-------------|-------|-----|------------------|------------------------|------------|----|--------|
| OPTIMUM, <sup>23</sup> | 2017.06- | multicenter | 56/54 | DES | >18 years, CAD   | pregnancy,             | percentage | NA | 1 year |
| 2020                   | 2018.09  |             |       |     | involving a      | intolerance to         | of         |    |        |
|                        |          |             |       |     | bifurcation with | aspirin, clopidogrel,  | malapposed |    |        |
|                        |          |             |       |     | objective        | heparin, cobalt        | struts     |    |        |
|                        |          |             |       |     | evidence of      | chromium,              |            |    |        |
|                        |          |             |       |     | ischemia,        | sirolimus, contrast    |            |    |        |
|                        |          |             |       |     | bifurcation      | material,              |            |    |        |
|                        |          |             |       |     | lesion, side     | thrombocytopaenia,     |            |    |        |
|                        |          |             |       |     | branch >2.0mm    | Contraindications to   |            |    |        |
|                        |          |             |       |     |                  | PCI, stenting,         |            |    |        |
|                        |          |             |       |     |                  | clopidogrel,           |            |    |        |
|                        |          |             |       |     |                  | prasugrel or           |            |    |        |
|                        |          |             |       |     |                  | ticagrelor,            |            |    |        |
|                        |          |             |       |     |                  | cardiogenic shock,     |            |    |        |
|                        |          |             |       |     |                  | planned surgery,       |            |    |        |
|                        |          |             |       |     |                  | history of stenting in |            |    |        |
|                        |          |             |       |     |                  | the target             |            |    |        |
|                        |          |             |       |     |                  | bifurcation lesion,    |            |    |        |
|                        |          |             |       |     |                  | renal insufficiency,   |            |    |        |

severely tortuous or  
angulated coronary  
anatomy

OCT versus IVUS

|                            |          |        |       |     |                                                                                                           |                                                                                                                                                                                                                               |           |       |    |          |
|----------------------------|----------|--------|-------|-----|-----------------------------------------------------------------------------------------------------------|-------------------------------------------------------------------------------------------------------------------------------------------------------------------------------------------------------------------------------|-----------|-------|----|----------|
| Habara, <sup>24</sup> 2012 | 2010.03- | single | 35/35 | BMS | symptomatic                                                                                               | LM disease, totally                                                                                                                                                                                                           |           | stent | NA | in-      |
|                            | 2010.11  | center |       | DES | ischemic heart disease, de novo lesion in the native coronary circulation, and planned stent implantation | occluded lesion, diffuse lesion, bifurcation lesion, lesion of large vessel, severe tortuous vessel, cardiogenic shock, LVEF <30%, serum creatinine >2 mg/dL, STEMI, and contraindication to aspirin, ticlopidine, or heparin | expansion |       |    | hospital |

FFR versus CAG

|                             |          |             |         |     |     |                                                                                    |      |                                  |         |
|-----------------------------|----------|-------------|---------|-----|-----|------------------------------------------------------------------------------------|------|----------------------------------|---------|
| FAME, <sup>25-27</sup> 2015 | 2006.01- | multicenter | 509/496 | DES | MVD | MI within 5 days, LM disease, previous CABG, cardiogenic shock, extremely tortuous | MACE | death, MI, and revascularization | 5 years |
|                             | 2007.09  |             |         |     |     |                                                                                    |      |                                  |         |

|                            |          |             |         |     |                     |                      |               |                |         |  |
|----------------------------|----------|-------------|---------|-----|---------------------|----------------------|---------------|----------------|---------|--|
|                            |          |             |         |     |                     | or calcified         |               |                |         |  |
|                            |          |             |         |     |                     | coronary arteries,   |               |                |         |  |
|                            |          |             |         |     |                     | life expectancy <2   |               |                |         |  |
|                            |          |             |         |     |                     | years,               |               |                |         |  |
|                            |          |             |         |     |                     | contraindication to  |               |                |         |  |
|                            |          |             |         |     |                     | DES, and pregnant    |               |                |         |  |
| DEFER-DES <sup>28</sup> ,  | 2006.11- | multicenter | 114/115 | DES | intermediate        | LM disease,          | MACE          | cardiac death, | 5 years |  |
| 2015                       | 2007.12  |             |         |     | stenosis (40%–      | cardiogenic shock,   |               | MI, and TLR    |         |  |
|                            |          |             |         |     | 70% diameter        | chronic kidney       |               |                |         |  |
|                            |          |             |         |     | stenosis)           | disease, life        |               |                |         |  |
|                            |          |             |         |     |                     | expectancy <2        |               |                |         |  |
|                            |          |             |         |     |                     | years, conduction    |               |                |         |  |
|                            |          |             |         |     |                     | disturbance more     |               |                |         |  |
|                            |          |             |         |     |                     | than first-degree AV |               |                |         |  |
|                            |          |             |         |     |                     | block, and           |               |                |         |  |
|                            |          |             |         |     |                     | contraindication to  |               |                |         |  |
|                            |          |             |         |     |                     | adenosine            |               |                |         |  |
| FAMOUS–                    | 2011.10- | multicenter | 176/174 | BMS | recent NSTEMI       | ischaemic            | proportion of | cardiac death, | 1 year  |  |
| NSTEMI, <sup>29</sup> 2015 | 2013.05  |             |         | DES | and with at least   | symptoms that        | patients      | MI, and heart  |         |  |
|                            |          |             |         |     | one risk factor for | were not controlled  | allocated to  | failure        |         |  |
|                            |          |             |         |     | CAD                 | by medical therapy,  | medical       |                |         |  |
|                            |          |             |         |     |                     | haemodynamic         | management    |                |         |  |
|                            |          |             |         |     |                     | instability, STEMI,  |               |                |         |  |
|                            |          |             |         |     |                     | intolerance to anti- |               |                |         |  |



cardiac death, 1 year  
MI, and TVR

|                           |          |        |         |     |        |        |                                |      |                |        |  |
|---------------------------|----------|--------|---------|-----|--------|--------|--------------------------------|------|----------------|--------|--|
|                           |          |        |         |     |        |        | antiplatelet therapy           |      |                |        |  |
|                           |          |        |         |     |        |        | interruption within 6          |      |                |        |  |
|                           |          |        |         |     |        |        | months post-PCI,               |      |                |        |  |
|                           |          |        |         |     |        |        | drug                           |      |                |        |  |
|                           |          |        |         |     |        |        | contraindication or            |      |                |        |  |
|                           |          |        |         |     |        |        | intolerance,                   |      |                |        |  |
|                           |          |        |         |     |        |        | glomerular filtration          |      |                |        |  |
|                           |          |        |         |     |        |        | rate <40 ml/min/               |      |                |        |  |
|                           |          |        |         |     |        |        | 1.73 m <sup>2</sup> , platelet |      |                |        |  |
|                           |          |        |         |     |        |        | count <10x10 <sup>9</sup> /L,  |      |                |        |  |
|                           |          |        |         |     |        |        | liver dysfunction,             |      |                |        |  |
|                           |          |        |         |     |        |        | pregnancy,                     |      |                |        |  |
|                           |          |        |         |     |        |        | expected life span             |      |                |        |  |
|                           |          |        |         |     |        |        | <1 year                        |      |                |        |  |
| Zhang, <sup>31</sup> 2016 | 2013.09- | single | 110/110 | DES | > 65   | years, | ongoing ischemic               | MACE | cardiovascular | 1 year |  |
|                           | 2016.06  | center |         |     | NSTEMI |        | symptoms,                      |      | death, MI, and |        |  |
|                           |          |        |         |     |        |        | cardiogenic shock              |      | heart failure  |        |  |
|                           |          |        |         |     |        |        | or hemodynamic                 |      |                |        |  |
|                           |          |        |         |     |        |        | instability,                   |      |                |        |  |
|                           |          |        |         |     |        |        | intolerance to                 |      |                |        |  |
|                           |          |        |         |     |        |        | antiplatelet drugs,            |      |                |        |  |
|                           |          |        |         |     |        |        | ineligibility for PCI,         |      |                |        |  |
|                           |          |        |         |     |        |        | stenosis <30%                  |      |                |        |  |
|                           |          |        |         |     |        |        | severity, highly               |      |                |        |  |

|                               |          |             |         |     |                 |                       |                       |                |                   |   |        |  |
|-------------------------------|----------|-------------|---------|-----|-----------------|-----------------------|-----------------------|----------------|-------------------|---|--------|--|
|                               |          |             |         |     |                 |                       | tortuous or calcified |                |                   |   |        |  |
|                               |          |             |         |     |                 |                       | coronary arteries,    |                |                   |   |        |  |
|                               |          |             |         |     |                 |                       | noncoronary           |                |                   |   |        |  |
|                               |          |             |         |     |                 |                       | cardiosurgery, and    |                |                   |   |        |  |
|                               |          |             |         |     |                 |                       | life expectancy <1    |                |                   |   |        |  |
|                               |          |             |         |     |                 |                       | year                  |                |                   |   |        |  |
| Quintella, <sup>32</sup> 2019 | 2011.04- | single      | 34/35   | DES | >21 years, MVD, | severe                | left                  | MACE           | death, angina,    | < | 12     |  |
|                               | 2016.05  | center      |         |     | at day 7 after  | ventricular           |                       |                | and restenosis    |   | months |  |
|                               |          |             |         |     | ACS             | dysfunction           |                       |                |                   |   |        |  |
| FLOWER-MI, <sup>33</sup>      | 2016.12- | multicenter | 586/577 | DES | ≥18 years,      | single-vessel         |                       | MACE           | death, nonfatal   |   | 1 year |  |
| 2021                          | 2018.12  |             |         |     | STEMI, MVD,     | disease,              |                       |                | MI, or unplanned  |   |        |  |
|                               |          |             |         |     | successful PCI  | hemodynamic           |                       |                | hospitalization   |   |        |  |
|                               |          |             |         |     | of IRA          | instability, previous |                       |                | leading to urgent |   |        |  |
|                               |          |             |         |     |                 | CABG, coronary-       |                       |                | revascularization |   |        |  |
|                               |          |             |         |     |                 | artery calcification  |                       |                |                   |   |        |  |
|                               |          |             |         |     |                 | or CTO, failed        |                       |                |                   |   |        |  |
|                               |          |             |         |     |                 | culprit-lesion PCI,   |                       |                |                   |   |        |  |
|                               |          |             |         |     |                 | and referral for      |                       |                |                   |   |        |  |
|                               |          |             |         |     |                 | CABG                  |                       |                |                   |   |        |  |
| OFDI versus                   |          |             |         |     |                 |                       |                       |                |                   |   |        |  |
| IVUS                          |          |             |         |     |                 |                       |                       |                |                   |   |        |  |
| OPINION, <sup>34</sup> 2017   | 2013.06- | multicenter | 412/405 | DES | 20-85 years     | MI within 3 months,   | target vessel         | cardiac death, |                   |   | 1 year |  |
|                               | 2014.07  |             |         |     | scheduled for   | cardiogenic shock,    | failure               | MI, and TLR    |                   |   |        |  |
|                               |          |             |         |     | PCI             | congestive heart      |                       |                |                   |   |        |  |

|                              |          |             |       |     |                   |                       |            |                   |         |  |
|------------------------------|----------|-------------|-------|-----|-------------------|-----------------------|------------|-------------------|---------|--|
|                              |          |             |       |     |                   | failure, chronic      |            |                   |         |  |
|                              |          |             |       |     |                   | kidney disease,       |            |                   |         |  |
|                              |          |             |       |     |                   | haemodialysis or      |            |                   |         |  |
|                              |          |             |       |     |                   | peritoneal dialysis,  |            |                   |         |  |
|                              |          |             |       |     |                   | planned surgery       |            |                   |         |  |
|                              |          |             |       |     |                   | within 1 year after   |            |                   |         |  |
|                              |          |             |       |     |                   | PCI, scheduled PCI    |            |                   |         |  |
|                              |          |             |       |     |                   | with BMS, triple-     |            |                   |         |  |
|                              |          |             |       |     |                   | vessel disease, LM    |            |                   |         |  |
|                              |          |             |       |     |                   | disease, aorto-       |            |                   |         |  |
|                              |          |             |       |     |                   | ostial lesion, CTO,   |            |                   |         |  |
|                              |          |             |       |     |                   | small vessel          |            |                   |         |  |
|                              |          |             |       |     |                   | disease, CABG, in-    |            |                   |         |  |
|                              |          |             |       |     |                   | stent restenosis      |            |                   |         |  |
| MISTIC-1, <sup>35</sup> 2020 | 2014.06- | multicenter | 54/55 | DES | >20 years, stable | renal insufficiency,  | in-segment | cardiovascular    | 3 years |  |
|                              | 2016.08  |             |       | CAD |                   | LVEF <30%,            | minimum    | mortality, MI, or |         |  |
|                              |          |             |       |     |                   | congestive heart      | lumen area | TLR               |         |  |
|                              |          |             |       |     |                   | failure, ACS within   |            |                   |         |  |
|                              |          |             |       |     |                   | 7 days,               |            |                   |         |  |
|                              |          |             |       |     |                   | nonsuitability for    |            |                   |         |  |
|                              |          |             |       |     |                   | DES use or dual       |            |                   |         |  |
|                              |          |             |       |     |                   | antiplatelet therapy, |            |                   |         |  |
|                              |          |             |       |     |                   | life expectancy <1    |            |                   |         |  |
|                              |          |             |       |     |                   | year, lesion          |            |                   |         |  |

length >28 mm,  
CTO, LM lesion,  
bifurcation lesion,  
or severely calcified  
lesion

OCT versus FFR

|                           |          |        |         |     |                   |                      |             |                |        |
|---------------------------|----------|--------|---------|-----|-------------------|----------------------|-------------|----------------|--------|
| FORZA, <sup>36</sup> 2020 | 2013.03- | single | 174/176 | DES | >18 years,        | pregnant, life       | significant | death, MI, and | 13     |
|                           | 2018.05  | center |         |     | ischemic heart    | expectancy <12       | residual    | TVR            | months |
|                           |          |        |         |     | disease, SVD      | months, follow up    | angina      |                |        |
|                           |          |        |         |     | with intermediate | difficult, LVEF      |             |                |        |
|                           |          |        |         |     | coronary lesion,  | ≤30%, STEMI <7       |             |                |        |
|                           |          |        |         |     | MVD with only     | days, NSTEMI <48     |             |                |        |
|                           |          |        |         |     | intermediate      | hours, prior STEMI   |             |                |        |
|                           |          |        |         |     | coronary lesion,  | in the territory     |             |                |        |
|                           |          |        |         |     | MVD with ≥1       | supplied by the      |             |                |        |
|                           |          |        |         |     | intermediate      | vessel with the      |             |                |        |
|                           |          |        |         |     | coronary lesion   | intermediate under   |             |                |        |
|                           |          |        |         |     | and already       | investigation,       |             |                |        |
|                           |          |        |         |     | treated           | severe myocardial    |             |                |        |
|                           |          |        |         |     | angiographically  | hypertrophy,         |             |                |        |
|                           |          |        |         |     | critical stenosis | severe valvular      |             |                |        |
|                           |          |        |         |     |                   | heart disease,       |             |                |        |
|                           |          |        |         |     |                   | significant platelet |             |                |        |
|                           |          |        |         |     |                   | count alteration,    |             |                |        |

gastrointestinal  
bleeding, clotting  
pathology,  
hypersensitivity to  
aspirin, heparin, or  
contrast dye,  
glomerular filtration  
rate <30 ml/min,  
MVD with ≥1  
untreated  
angiographically  
critical stenosis or  
coronary occlusion,  
lesions in coronary  
artery bypass  
grafts, and MVD  
requiring CABG

| FFR versus iFR              |          |             |           |     |                   |                  |      |                   |        |
|-----------------------------|----------|-------------|-----------|-----|-------------------|------------------|------|-------------------|--------|
| DEFINE-FLAIR, <sup>37</sup> | 2014.01- | multicenter | 1242/1250 | DES | >18 years,        | previous CABG,   | MACE | death, MI, and    | 1 year |
| 2017                        | 2015.12  |             |           |     | eligible for PCI, | LM disease,      |      | revascularization |        |
|                             |          |             |           |     | CAD, ≥1 native    | tandem stenoses, |      |                   |        |
|                             |          |             |           |     | artery with       | CTO, restenotic  |      |                   |        |
|                             |          |             |           |     | physiological     | lesions,         |      |                   |        |
|                             |          |             |           |     | severity, stable  | haemodynamic     |      |                   |        |

|                          |          |             |           |     |                 |                                                                                                                                                                                                                                                 |      |                   |        |
|--------------------------|----------|-------------|-----------|-----|-----------------|-------------------------------------------------------------------------------------------------------------------------------------------------------------------------------------------------------------------------------------------------|------|-------------------|--------|
|                          |          |             |           |     | angina or ACS   | instability,<br>contraindication to<br>adenosine<br>administration, PCI,<br>or DES, calcified or<br>tortuous vessels,<br>hepatic or lung<br>disease,<br>pregnancy, STEMI<br>within 48 hours,<br>valvular heart<br>disease, ≥ 1 target<br>vessel |      |                   |        |
| iFR-                     | 2014.05- | multicenter | 1019/1018 | DES | ≥ 18 years,     | previous CABG                                                                                                                                                                                                                                   | MACE | death, MI, and    | 1 year |
| SWEDHEART, <sup>38</sup> | 2015.10  |             |           |     | stable angina   | with patent grafts to                                                                                                                                                                                                                           |      | revascularization |        |
| 2017                     |          |             |           |     | pectoris or     | the interrogated                                                                                                                                                                                                                                |      |                   |        |
|                          |          |             |           |     | unstable angina | vessel, life                                                                                                                                                                                                                                    |      |                   |        |
|                          |          |             |           |     | pectoris/NSTEMI | expectancy <1                                                                                                                                                                                                                                   |      |                   |        |
|                          |          |             |           |     |                 | year, MVD, Killip                                                                                                                                                                                                                               |      |                   |        |
|                          |          |             |           |     |                 | class III-IV, inability                                                                                                                                                                                                                         |      |                   |        |
|                          |          |             |           |     |                 | to tolerate                                                                                                                                                                                                                                     |      |                   |        |
|                          |          |             |           |     |                 | adenosine, calcified                                                                                                                                                                                                                            |      |                   |        |
|                          |          |             |           |     |                 | or tortuous vessels                                                                                                                                                                                                                             |      |                   |        |

| OCT versus IVUS versus CAG     |                 |             |             |     |                 |                     |            |                   |        |  |
|--------------------------------|-----------------|-------------|-------------|-----|-----------------|---------------------|------------|-------------------|--------|--|
| ILUMIEN III, <sup>39, 40</sup> | 2015.05-2016.04 | multicenter | 158/146/146 | DES | >18 years,      | LM or ostial RCA    | post-PCI   | death, MI, stent  | 1 year |  |
| 2021                           |                 |             |             |     | angina, silent  | stenoses, bypass    | minimum    | thrombosis, or    |        |  |
|                                |                 |             |             |     | ischaemia,      | graft stenoses,     | stent area | repeat            |        |  |
|                                |                 |             |             |     | NSTEMI, recent  | CTO, planned two-   |            | revascularisation |        |  |
|                                |                 |             |             |     | STEMI >24 h     | stent bifurcations, |            |                   |        |  |
|                                |                 |             |             |     | from initial    | and in-stent        |            |                   |        |  |
|                                |                 |             |             |     | presentation,   | restenosis          |            |                   |        |  |
|                                |                 |             |             |     | vessel diameter |                     |            |                   |        |  |
|                                |                 |             |             |     | of 2.25–3.50    |                     |            |                   |        |  |
|                                |                 |             |             |     | mm, length < 40 |                     |            |                   |        |  |
|                                |                 |             |             |     | mm              |                     |            |                   |        |  |

ACS: acute coronary syndrome; BMS: bare metal stent; BVS: bioresorbable vascular scaffolds; CABG: coronary artery bypass graft; CAD: coronary artery disease; CAG: coronary angiography; CTO: chronic total occlusion; DES: drug-eluting stents; FFR: fractional flow reserve; iFR: instantaneous wave-free ratio; IRA: infarct related artery; IVUS: intravenous ultrasound; LAD: left anterior descending artery; LM: left main coronary artery; LVEF: left ventricular ejection fractions; MACE: major adverse cardiovascular events; MI: myocardial infarction; MVD: multivessel coronary artery disease; NSTEMI: non-ST segment elevation myocardial infarction; PCI: percutaneous coronary intervention; OCT: optical coherence tomography; OFDI: optical frequency domain imaging; PTCA: percutaneous transluminal coronary angioplasty; RCA: right coronary artery; STEMI: ST elevation myocardial infarction; SVD: single vessel disease; TIMI: thrombolysis in myocardial infarction; TLR: target lesion revascularization; TVR: target vessel revascularization



Table S2 Clinical Characteristics of Patients Across Studies Included in the Network Meta-Analysis

| Study/First author, year     | Age                 | Male, %   | Diabetes, % | Hypertension, % | Dyslipidemia, % | Smoker, % | Previous MI, % | Previous PCI, % | Previous CABG, % | ACS, %    | LVEF, %             | LM, %   | LAD, %    | LCX, %    | RCA, %    |
|------------------------------|---------------------|-----------|-------------|-----------------|-----------------|-----------|----------------|-----------------|------------------|-----------|---------------------|---------|-----------|-----------|-----------|
| IVUS versus CAG              |                     |           |             |                 |                 |           |                |                 |                  |           |                     |         |           |           |           |
| SIPS, <sup>1</sup> 2000      | 61.2±8.1/60.7±9.6   | 82/76     | 16/16       | 64/56           | 88/87           | 47/45     | 58/52          | NA              | 11/10            | NA        | NA                  | 0       | 38/41     | 27/27     | 30/30     |
| CRUISE, <sup>2</sup> 2000    | 60±11/ 61±11        | 69/72     | 23/18       | 52/59           | 39/33           | NA        | 32/41          | NA              | 9/7              | 0         | 55±10 54±12         | 0       | 43/46     | 24/18     | 33/36     |
| OPTICUS, <sup>3</sup> 2001   | 60.1±10.0/61.5±9.5  | 77/78     | 17/17       | 48/52           | 61/67           | 69/66     | 32/32          | 20/20           | 3/4              | 13/12     | 56.5±14.0/57.7±14.3 | 0       | 51/50     | 18/14     | 30/35     |
| Gaster, <sup>4, 5</sup> 2003 | 57/57               | NA        | 4/11        | 20/24           | 96/93           | 30/15     | 54/44          | 6/15            | 7/4              | 0         | NA                  | NA      | NA        | NA        | NA        |
| TULIP, <sup>6</sup> 2003     | 61±10/63±10         | 71/72     | 16/21       | 27/30           | 61/62           | 40/53     | NA             | NA              | NA               | 0         | <40% (0)            | 0       | 39/38     | 10/21     | 51/41     |
| DIPOL, <sup>7</sup> 2007     | 56±8/54±8           | 81/83     | 10/11       | NA              | 47/40           | 47/52     | 44/40          | NA              | NA               | 0         | 52±9/48±10          | 0       | 41/46     | 26/24     | 33/30     |
| AVID, <sup>8</sup> 2009      | 62±12/63±11         | 73/68     | 15/17       | 46/45           | 40/44           | NA        | 35/29          | 24/25           | 18/20            | 0         | 53±13/55±13         | 0.8/0.5 | 40/37     | 15/18     | 35/32     |
| Jakabcin, <sup>9</sup> 2010  | 59.4±13/60.2±11     | 73/71     | 42/45       | 67/71           | 63/66           | 40/35     | 37/32          | 17/14           | 14/10            | 62/60     | NA                  | 3/4     | 56/54     | 11/15     | 29/24     |
| AVIO, <sup>10</sup> 2013     | 63.9±10.1/63.6±11.0 | 82.4/76.8 | 23.9/26.8   | 70.4/66.9       | 70.4/76.8       | 34.5/31.0 | NA             | NA              | NA               | 0         | 55.3±8.5/55.9±8.6   | 0       | 53.3/48.6 | NA        | NA        |
| RESET, <sup>11</sup> 2013    | 62.8±9.3/64.3±8.7   | 65.8/54.7 | 31.6/29.9   | 61.3/65.8       | 61.3/61.7       | 21.6/17.2 | 1.1/2.9        | NA              | NA               | 8.9/9/9   | 55.3±23.9/54.0±25.0 | 0       | 50.0/57.5 | 20.7/18.4 | 29.3/24.1 |
| MOZART, <sup>12</sup> 2014   | 67.1/62.1           | 61.0/57.7 | 73.2/81.0   | 97.6/100        | NA              | 41.5/40.4 | NA             | 26.8/11.9       | 14.6/16.7        | 14.6/16.7 | NA                  | 4.9/7.1 | 34.1/52.3 | 46.3/46.3 | 22.0/22.0 |

|                                |                      |          |            |            |            |            |          |          |         |           |                     |         |          |          |          |
|--------------------------------|----------------------|----------|------------|------------|------------|------------|----------|----------|---------|-----------|---------------------|---------|----------|----------|----------|
|                                |                      | 1        |            |            |            |            |          |          |         | 7         |                     |         | 4        | 28.6     | 35.7     |
| Tan <sup>13</sup> , 2015       | 76.54±4.95/          | 62.3/69. | 34.4/ 29.5 | 41.0/ 46.8 | NA         | 44.3/ 46.8 | 16.4/    | NA       | NA      | 70.5/66.  | 55.32±5.02/         | 100/10  | 0        | 0        | 0        |
|                                | 75.85±3.49           | 4        |            |            |            |            | 21.0     |          |         | 1         | 53.33±7.14          | 0       |          |          |          |
| AIR-CTO <sup>14</sup> , 2015   | 67/66                | 88.7/80. | 29.6/27.0  | 74.8/70.4  | 21.7/27.8  | 39.1/39.1  | NA       | NA       | NA      | 28.7/24.  | 55/56               | 0/2.6   | 44.3/36. | 20.9/14. | 34.8/46. |
|                                |                      | 0        |            |            |            |            |          |          |         | 4         |                     |         | 5        | 8        | 1        |
| IVUS-XPL, <sup>15</sup> 2015   | 64±9/64±9            | 69/69    | 36/37      | 65/63      | 67/65      | 22/26      | 5/4      | 11/10    | 3/2     | 14/17     | 62.9±9.8/62.4±10.2  | 0       | 65/60    | 14/15    | 21/25    |
| CTO-IVUS, <sup>16</sup> 2015   | 61.0±11.1/ 61.4±10.1 | 80.6/    | 34.8/ 33.8 | 62.7/ 63.7 | NA         | 35.3/ 34.3 | 8.0/ 8.0 | 15.4/    | 1.5/.5  | 0         | 56.9±13.1/          | 0       | 41.8/    | 14.4/    | 43.8/    |
|                                |                      | 80.6     |            |            |            |            |          | 15.9     |         |           | 56.7±11.4           |         | 46.8     | 15.9     | 37.3     |
| Wang, <sup>17</sup> 2015       | 56.4±9.4/ 53.7±11.8  | 60.5/66. | 21.1/11.9  | 39.5/23.8  | 26.3/23.8  | 50.0/59.5  | NA       | NA       | 0       | 100/100   | 48.3±5.7/49. ±5.9   | 0       | 39.5/42. | 15.8/7.1 | 44.7/50. |
|                                |                      | 7        |            |            |            |            |          |          |         |           |                     |         | 9        |          | 0        |
| ULTIMATE, <sup>18</sup> 2018   | 65.2±10.9/65.9±9.8   | 73.9/73. | 30.0/31.2  | 70.7/72.0  | 53.7/55.2  | 34.9/31.5  | 9.3/11.9 | 17.4/19. | 1.4/1.1 | 11.2/14.0 | 60.9±7.9/60.3±9.3   | 9.9/8.6 | 47.5/46. | 17.3/16. | 25.4/28. |
|                                |                      | 2        |            |            |            |            |          | 9        |         |           |                     |         | 7        | 8        | 0        |
| SURF, <sup>19</sup> 2019       | 63.38±11.1/63.60±11. | 70.9/74. | 32.8/35.1  | 64.5/66.7  | 63.1/60.7  | 61.2/62.3  | 14.7/16. | 20.5/20. | 3.3/4.3 | 76.5/73.  | NA                  | NA      | NA       | NA       | NA       |
|                                | 5                    | 0        |            |            |            |            | 4        | 0        |         | 8         |                     |         |          |          |          |
| OCT versus CAG                 |                      |          |            |            |            |            |          |          |         |           |                     |         |          |          |          |
| DOCTORS, <sup>20</sup> 2016    | 60.8±11.5/ 60.2±11.3 | 79.2/    | 21.7/ 15.8 | 55.8/ 41.7 | 49.2/ 46.7 | 39.2/ 42.5 | NA       | NA       | 0       | 100/100   | NA                  | 0       | NA       | NA       | NA       |
|                                |                      | 75.8     |            |            |            |            |          |          |         |           |                     |         |          |          |          |
| ROBUST, <sup>21</sup> 2018     | 57/59                | 83/87    | 17/26      | 50/52      | NA         | 64/59      | 1/6      | 4/4      | 0       | 100/100   | NA                  | 0       | 39/32    | 16/12    | 48/52    |
| OPTICO BVS, <sup>22</sup> 2020 | 63.3±12.7/ 62.9±9.1  | 79/79    | 21/21      | 37/58      | 68/63      | 37/32      | 21/11    | 32/16    | NA      | 53/26     | 61.0±7.6/ 64.4±10.5 | 0       | 38/40    | 24/10    | 38/50    |

[illegible]

| OFDI versus IVUS                       |                      |          |            |           |            |            |          |          |          |           |           |         |          |          |          |
|----------------------------------------|----------------------|----------|------------|-----------|------------|------------|----------|----------|----------|-----------|-----------|---------|----------|----------|----------|
| OPINION, <sup>34</sup> 2017            | 69±9/ 68±9           | 76.5/    | 41.0/ 40.7 | 76.5/73.8 | 76.7/ 79.3 | 16.3/ 18.0 | 17.0/    | 34.0/    | 1.7/ 2.2 | 13.1/11.7 | NA        | 0       | 54.1/    | 20.4/    | 24.8/    |
|                                        |                      | 79.5     |            |           |            |            | 15.1     | 34.6     |          |           |           |         | 48.6     | 21.5     | 28.9     |
| MISTIC-1, <sup>35</sup> 2020           | 72/71                | 75.9/80. | 50.0/43.6  | 63.0/70.9 | 79.6/65.5  | 40.7/21.8  | 35.2/29. | 44.4/47. | 0        | 0         | 58/57     | 0       | 50.0/39. | 21.0/26. | 29.0/34. |
|                                        |                      | 0        |            |           |            |            | 1        | 3        |          |           |           |         | 1        | 6        | 4        |
| OCT versus FFR                         |                      |          |            |           |            |            |          |          |          |           |           |         |          |          |          |
| FORZA, <sup>36</sup> 2020              | 69±9/ 68±10          | 77.6/71. | 36.2/34.7  | 86.8/84.1 | 84.7/68.2  | 37.9/39.8  | 29.9/18. | 43.7/41. | 2.9/2.3  | 17.8/21.  | 56±9/60±8 | 0       | 60.6/66. | 12.2/16. | 27.1/16. |
|                                        |                      | 6        |            |           |            |            | 8        | 5        |          | 0         |           |         | 7        | 4        | 9        |
| FFR versus iFR                         |                      |          |            |           |            |            |          |          |          |           |           |         |          |          |          |
| DEFINE-FLAIR, <sup>37</sup> 2017       | 65.5±10.8/ 65.2±10.6 | 77.5/    | 30.8/30.1  | 70.3/70.7 | 63.9/63.4  | 56.7/56.4  | 28.8/30. | 39.4/42. | 0        | 15.0/14.  | NA        | 0       | 53.6/52. | 20.5/20. | 23.7/24. |
|                                        |                      | 74.3     |            |           |            |            | 1        | 2        |          | 7         |           |         | 5        | 7        | 4        |
| iFR-<br>SWEDEHEART, <sup>38</sup> 2017 | 67.6±9.6/67.4±9.2    | 74.2/75. | 22.8/20.9  | 71.6/69.7 | 71.9/69.2  | 64.8/62.2  | 33.1/32. | 42.1/41. | 4.8/4.2  | 17.3/17.  | NA        | 1.5/1.6 | 47.4/47. | 19.2/18. | 17.9/20. |
|                                        |                      | 2        |            |           |            |            | 9        | 7        |          | 5         |           |         | 9        | 3        | 0        |
| OCT versus IVUS versus CAG             |                      |          |            |           |            |            |          |          |          |           |           |         |          |          |          |
| ILUMIEN III, <sup>39, 40</sup> 2021    | 66/66/67             | 69/73/73 | 33/38/29   | 78/77     | 75         | 18/13/24   | 22/20/22 | 7/5/10   | 2/8/5    | 13/13/16  | NA        | 0       | 51/47/57 | 27/29/21 | 22/25/22 |

Values refer to corresponding treatment arms from original studies.

ACS: acute coronary syndrome; CABG: coronary artery bypass graft; CAG: coronary angiography; FFR: fractional flow reserve; iFR: instantaneous wave-free ratio; IVUS: intravenous ultrasound; LAD: left anterior descending artery; LCX: left circumflex artery; LM: left main coronary artery; LVEF: left ventricular ejection fractions; NA: not available; MI: myocardial infarction; OCT: optical coherence tomography; OFDI: optical frequency domain imaging; PCI: percutaneous coronary intervention; RCA: right coronary artery

## References

1. Frey AW, Hodgson JM, Müller C, Bestehorn HP, Roskamm H. Ultrasound-guided strategy for provisional stenting with focal balloon combination catheter: results from the randomized Strategy for Intracoronary Ultrasound-guided PTCA and Stenting (SIPS) trial. *Circulation* 2000;102(20):2497-502.
2. Fitzgerald PJ, Oshima A, Hayase M, Metz JA, Bailey SR, Baim DS, et al. Final results of the Can Routine Ultrasound Influence Stent Expansion (CRUISE) study. *Circulation* 2000;102(5):523-30.
3. Mudra H, di Mario C, de Jaegere P, Figulla HR, Macaya C, Zahn R, et al. Randomized comparison of coronary stent implantation under ultrasound or angiographic guidance to reduce stent restenosis (OPTICUS Study). *Circulation* 2001;104(12):1343-9.
4. Gaster AL, Slothuus U, Larsen J, Thayssen P, Haghfelt T. Cost-effectiveness analysis of intravascular ultrasound guided percutaneous coronary intervention versus conventional percutaneous coronary intervention. *Scand Cardiovasc J* 2001;35(2):80-5.
5. Gaster AL, Slothuus Skjoldborg U, Larsen J, Korsholm L, von Birgelen C, Jensen S, et al. Continued improvement of clinical outcome and cost effectiveness following intravascular ultrasound guided PCI: insights from a prospective, randomised study. *Heart* 2003;89(9):1043-9.
6. Oemrawsingh PV, Mintz GS, Schali J, Zwinderman AH, Jukema JW, van der Wall EE. Intravascular ultrasound guidance improves angiographic and clinical outcome of stent implantation for long coronary artery stenoses: final results of a randomized comparison with angiographic guidance (TULIP

Study). *Circulation* 2003;107(1):62-7.

7. Gil RJ, Pawłowski T, Dudek D, Horszczaruk G, Zmudka K, Lesiak M, et al. Comparison of angiographically guided direct stenting technique with direct stenting and optimal balloon angioplasty guided with intravascular ultrasound. The multicenter, randomized trial results. *Am Heart J* 2007;154(4):669-75.
8. Russo RJ, Silva PD, Teirstein PS, Attubato MJ, Davidson CJ, DeFranco AC, et al. A randomized controlled trial of angiography versus intravascular ultrasound-directed bare-metal coronary stent placement (the AVID Trial). *Circ Cardiovasc Interv* 2009;2(2):113-23.
9. Jakabcin J, Spacek R, Bystron M, Kvasnák M, Jager J, Veselka J, et al. Long-term health outcome and mortality evaluation after invasive coronary treatment using drug eluting stents with or without the IVUS guidance. Randomized control trial. HOME DES IVUS. *Catheter Cardiovasc Interv* 2010;75(4):578-83.
10. Chieffo A, Latib A, Caussin C, Presbitero P, Galli S, Menozzi A, et al. A prospective, randomized trial of intravascular-ultrasound guided compared to angiography guided stent implantation in complex coronary lesions: the AVIO trial. *Am Heart J* 2013;165(1):65-72.
11. Kim JS, Kang TS, Mintz GS, Park BE, Shin DH, Kim BK, et al. Randomized comparison of clinical outcomes between intravascular ultrasound and angiography-guided drug-eluting stent implantation for long coronary artery stenoses. *JACC Cardiovasc Interv* 2013;6(4):369-76.

12. Mariani J, Jr., Guedes C, Soares P, Zalc S, Campos CM, Lopes AC, et al. Intravascular ultrasound guidance to minimize the use of iodine contrast in percutaneous coronary intervention: the MOZART (Minimizing cOntrast utiliZation With IVUS Guidance in coRonary angioplasTy) randomized controlled trial. *JACC Cardiovasc Interv* 2014;7(11):1287-93.
13. Tan Q, Wang Q, Liu D, Zhang S, Zhang Y, Li Y. Intravascular ultrasound-guided unprotected left main coronary artery stenting in the elderly. *Saudi Med J* 2015;36(5):549-53.
14. Tian NL, Gami SK, Ye F, Zhang JJ, Liu ZZ, Lin S, et al. Angiographic and clinical comparisons of intravascular ultrasound- versus angiography-guided drug-eluting stent implantation for patients with chronic total occlusion lesions: two-year results from a randomised AIR-CTO study. *EuroIntervention* 2015;10(12):1409-17.
15. Hong SJ, Kim BK, Shin DH, Nam CM, Kim JS, Ko YG, et al. Effect of Intravascular Ultrasound-Guided vs Angiography-Guided Everolimus-Eluting Stent Implantation: The IVUS-XPL Randomized Clinical Trial. *Jama* 2015;314(20):2155-63.
16. Kim BK, Shin DH, Hong MK, Park HS, Rha SW, Mintz GS, et al. Clinical Impact of Intravascular Ultrasound-Guided Chronic Total Occlusion Intervention With Zotarolimus-Eluting Versus Biolimus-Eluting Stent Implantation: Randomized Study. *Circ Cardiovasc Interv* 2015;8(7):e002592.
17. Wang HX, Dong PS, Li ZJ, Wang HL, Wang K, Liu XY. Application of Intravascular Ultrasound in the Emergency Diagnosis and Treatment of Patients

with ST-Segment Elevation Myocardial Infarction. *Echocardiography* 2015;32(6):1003-8.

18. Zhang J, Gao X, Kan J, Ge Z, Han L, Lu S, et al. Intravascular Ultrasound Versus Angiography-Guided Drug-Eluting Stent Implantation: The ULTIMATE Trial. *J Am Coll Cardiol* 2018;72(24):3126-3137.
19. Nguyen P, Makris A, Hennessy A, Jayanti S, Wang A, Park K, et al. Standard versus ultrasound-guided radial and femoral access in coronary angiography and intervention (SURF): a randomised controlled trial. *EuroIntervention* 2019;15(6):e522-e530.
20. Meneveau N, Souteyrand G, Motreff P, Caussin C, Amabile N, Ohlmann P, et al. Optical Coherence Tomography to Optimize Results of Percutaneous Coronary Intervention in Patients with Non-ST-Elevation Acute Coronary Syndrome: Results of the Multicenter, Randomized DOCTORS Study (Does Optical Coherence Tomography Optimize Results of Stenting). *Circulation* 2016;134(13):906-17.
21. Kala P, Cervinka P, Jakl M, Kanovsky J, Kupec A, Spacek R, et al. OCT guidance during stent implantation in primary PCI: A randomized multicenter study with nine months of optical coherence tomography follow-up. *Int J Cardiol* 2018;250:98-103.
22. Ueki Y, Yamaji K, Barbato E, Nef H, Brugaletta S, Alfonso F, et al. Randomized Comparison of Optical Coherence Tomography Versus Angiography to Guide Bioresorbable Vascular Scaffold Implantation: The OPTICO BVS Study. *Cardiovasc Revasc Med* 2020;21(10):1244-1250.
23. Onuma Y, Kogame N, Sotomi Y, Miyazaki Y, Asano T, Takahashi K, et al. A Randomized Trial Evaluating Online 3-Dimensional Optical Frequency



Domain Imaging-Guided Percutaneous Coronary Intervention in Bifurcation Lesions. *Circ Cardiovasc Interv* 2020;13(12):e009183.

24. Habara M, Nasu K, Terashima M, Kaneda H, Yokota D, Ko E, et al. Impact of frequency-domain optical coherence tomography guidance for optimal coronary stent implantation in comparison with intravascular ultrasound guidance. *Circ Cardiovasc Interv* 2012;5(2):193-201.
25. Tonino PA, De Bruyne B, Pijls NH, Siebert U, Ikeno F, van' t Veer M, et al. Fractional flow reserve versus angiography for guiding percutaneous coronary intervention. *N Engl J Med* 2009;360(3):213-24.
26. Pijls NH, Fearon WF, Tonino PA, Siebert U, Ikeno F, Bornschein B, et al. Fractional flow reserve versus angiography for guiding percutaneous coronary intervention in patients with multivessel coronary artery disease: 2-year follow-up of the FAME (Fractional Flow Reserve Versus Angiography for Multivessel Evaluation) study. *J Am Coll Cardiol* 2010;56(3):177-84.
27. van Nunen LX, Zimmermann FM, Tonino PA, Barbato E, Baumbach A, Engstrøm T, et al. Fractional flow reserve versus angiography for guidance of PCI in patients with multivessel coronary artery disease (FAME): 5-year follow-up of a randomised controlled trial. *Lancet* 2015;386(10006):1853-60.
28. Park SH, Jeon KH, Lee JM, Nam CW, Doh JH, Lee BK, et al. Long-Term Clinical Outcomes of Fractional Flow Reserve-Guided Versus Routine Drug-Eluting Stent Implantation in Patients With Intermediate Coronary Stenosis: Five-Year Clinical Outcomes of DEFER-DES Trial. *Circ Cardiovasc Interv* 2015;8(12):e002442.

29. Layland J, Oldroyd KG, Curzen N, Sood A, Balachandran K, Das R, et al. Fractional flow reserve vs. angiography in guiding management to optimize outcomes in non-ST-segment elevation myocardial infarction: the British Heart Foundation FAMOUS-NSTEMI randomized trial. *Eur Heart J* 2015;36(2):100-11.
30. Chen SL, Ye F, Zhang JJ, Xu T, Tian NL, Liu ZZ, et al. Randomized Comparison of FFR-Guided and Angiography-Guided Provisional Stenting of True Coronary Bifurcation Lesions: The DKCRUSH-VI Trial (Double Kissing Crush Versus Provisional Stenting Technique for Treatment of Coronary Bifurcation Lesions VI). *JACC Cardiovasc Interv* 2015;8(4):536-46.
31. Zhang Z, Li K, Tian J. Efficacy and safety outcomes of fractional flow reserve in guiding clinical therapy of non-ST-segment elevation myocardial infarction compared with angiography alone in elderly Chinese patients. *Clin Interv Aging* 2016;11:1751-1754.
32. Quintella EF, Ferreira E, Azevedo VMP, Araujo DV, Sant'Anna FM, Amorim B, et al. Clinical Outcomes and Cost-Effectiveness Analysis of FFR Compared with Angiography in Multivessel Disease Patient. *Arq Bras Cardiol* 2019;112(1):40-47.
33. Puymirat E, Cayla G, Simon T, Steg PG, Montalescot G, Durand-Zaleski I, et al. Multivessel PCI Guided by FFR or Angiography for Myocardial Infarction. *N Engl J Med* 2021;385(4):297-308.
34. Kubo T, Shinke T, Okamura T, Hibi K, Nakazawa G, Morino Y, et al. Optical frequency domain imaging vs. intravascular ultrasound in percutaneous

coronary intervention (OPINION trial): one-year angiographic and clinical results. *Eur Heart J* 2017;38(42):3139-3147.

35. Muramatsu T, Ozaki Y, Nanasato M, Ishikawa M, Nagasaka R, Ohota M, et al. Comparison Between Optical Frequency Domain Imaging and Intravascular Ultrasound for Percutaneous Coronary Intervention Guidance in Biolimus A9-Eluting Stent Implantation: A Randomized MISTIC-1 Non-Inferiority Trial. *Circ Cardiovasc Interv* 2020;13(11):e009314.
36. Burzotta F, Leone AM, Aurigemma C, Zambrano A, Zimbardo G, Ariotti M, et al. Fractional Flow Reserve or Optical Coherence Tomography to Guide Management of Angiographically Intermediate Coronary Stenosis: A Single-Center Trial. *JACC Cardiovasc Interv* 2020;13(1):49-58.
37. Davies JE, Sen S, Dehbi HM, Al-Lamee R, Petraco R, Nijjer SS, et al. Use of the Instantaneous Wave-free Ratio or Fractional Flow Reserve in PCI. *N Engl J Med* 2017;376(19):1824-1834.
38. Götzberg M, Christiansen EH, Gudmundsdottir IJ, Sandhall L, Danielewicz M, Jakobsen L, et al. Instantaneous Wave-free Ratio versus Fractional Flow Reserve to Guide PCI. *N Engl J Med* 2017;376(19):1813-1823.
39. Ali ZA, Maehara A, G  n  reux P, Shlofmitz RA, Fabbiochi F, Nazif TM, et al. Optical coherence tomography compared with intravascular ultrasound and with angiography to guide coronary stent implantation (ILUMIEN III: OPTIMIZE PCI): a randomised controlled trial. *Lancet* 2016;388(10060):2618-2628.

40. Ali ZA, Karimi Galougahi K, Maehara A, Shlofmitz RA, Fabbicchi F, Guagliumi G, et al. Outcomes of optical coherence tomography compared with intravascular ultrasound and with angiography to guide coronary stent implantation: one-year results from the ILUMIEN III: OPTIMIZE PCI trial. *EuroIntervention* 2021;16(13):1085-1091.
